# Supplementary material for: Analysis of correlations between gut microbiota, stool short chain fatty acids, calprotectin and cardiometabolic risk factors in postmenopausal women with obesity: a cross-sectional study
Source: Springer Nature journal article supplement (doi:10.1186/s12967-022-03801-0), 2022-12-12
Supplement: MOESM1 [file 23816274]

## Supplementary data

### **Analysis of correlations between gut microbiota, stool short chain fatty acids, calprotectine, and anthropometric, physiological and biochemical parameters in postmenopausal women with obesity: A cross-sectional study**

Igor Łoniewski, Monika Szulińska, Mariusz Kaczmarczyk, Konrad Podsiadło, Daniel Styburski, Karolina Skonieczna-Żydecka, Paweł Bogdański

Supplementary Figure 1. Flow chart of the study population

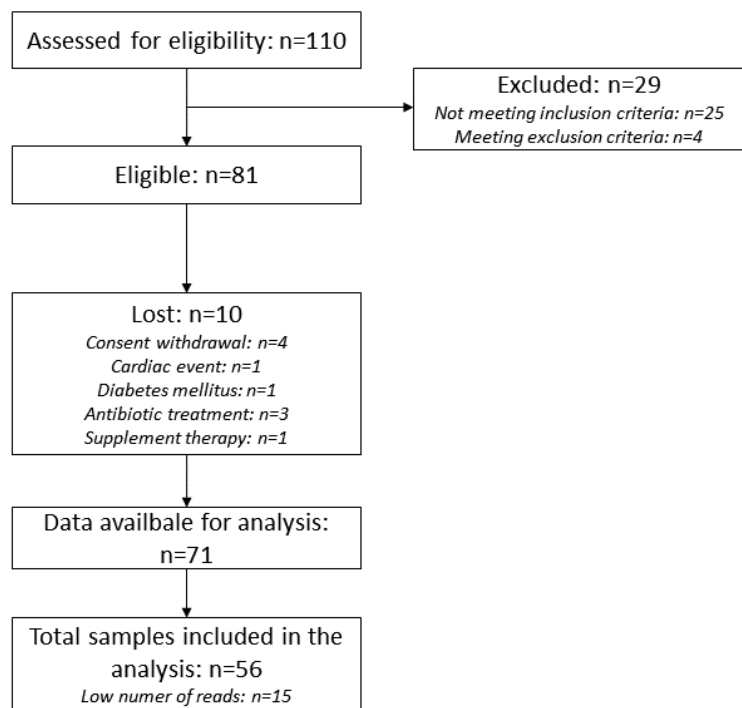

## Supplementary Figure 2. Heatmaps of the rarefied abundance at different taxonomic levels

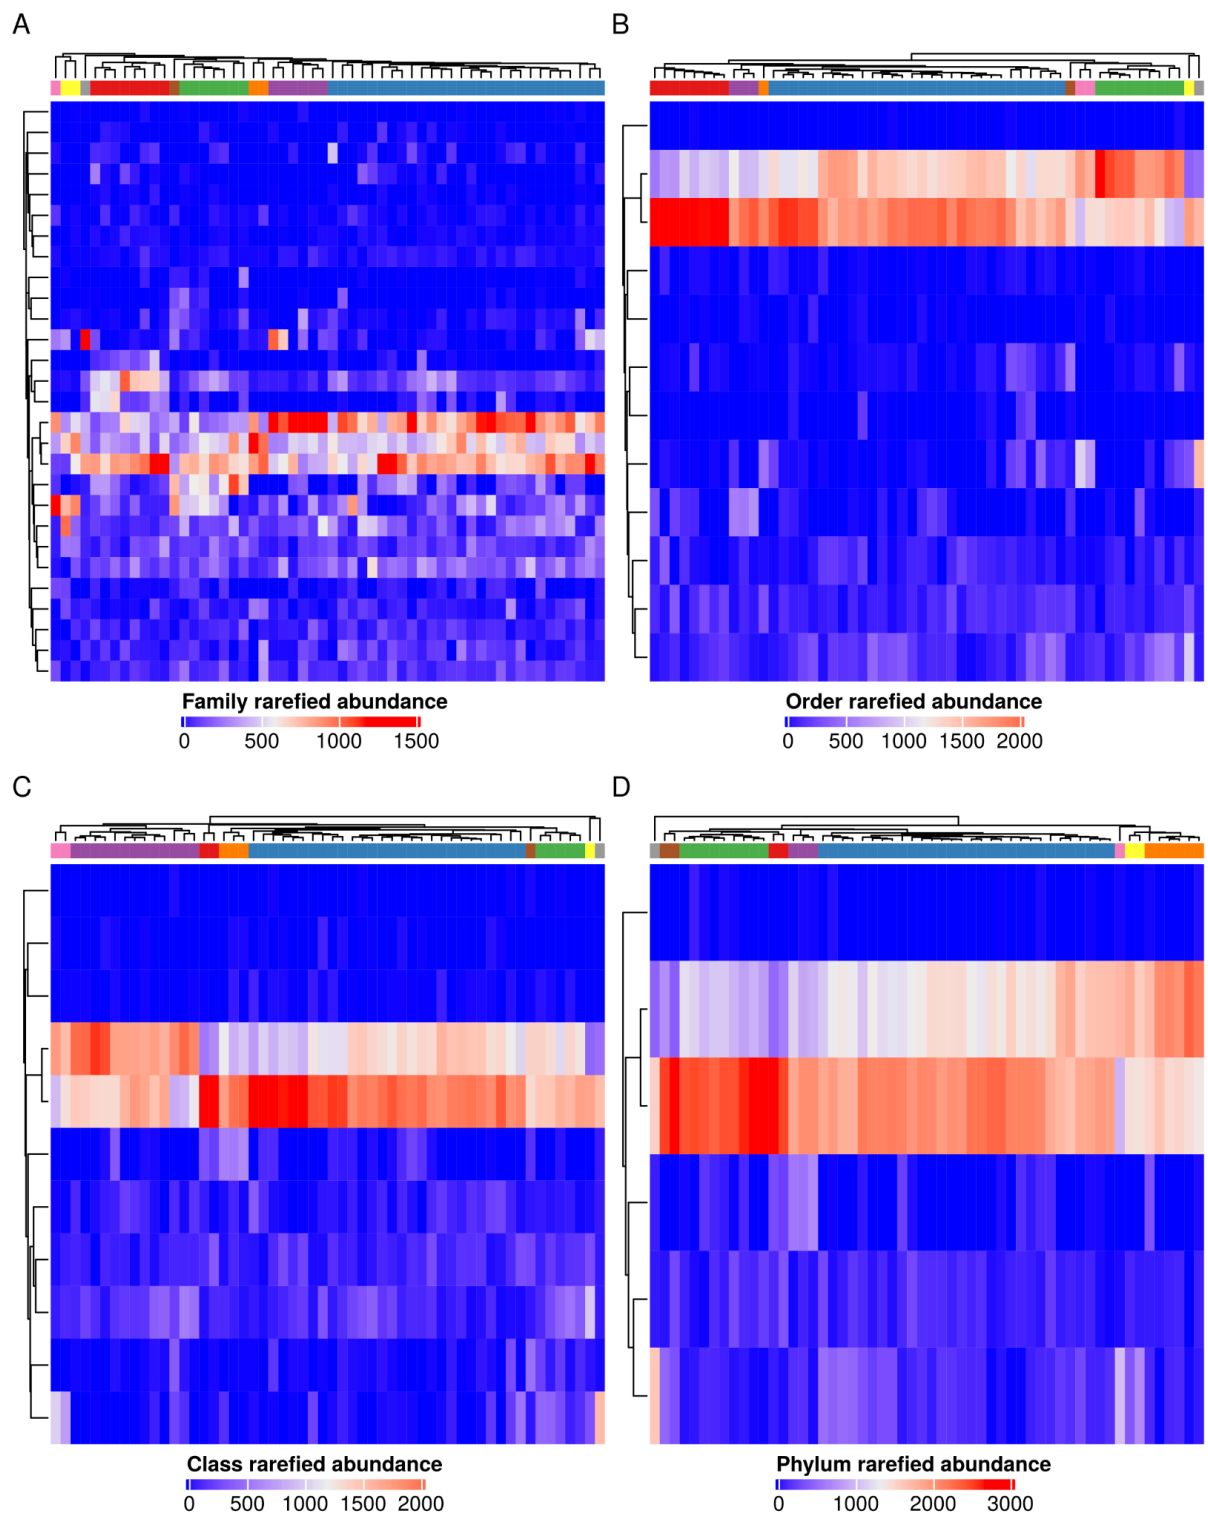

Columns (samples) and rows (taxa) were subjected to average linkage method and genus-level Bray-Curtis distance hierarchical clustering, top annotation - color bars reflect identified clusters

### Supplementary Figure 3. Alpha-diversity correlation with SCFAs

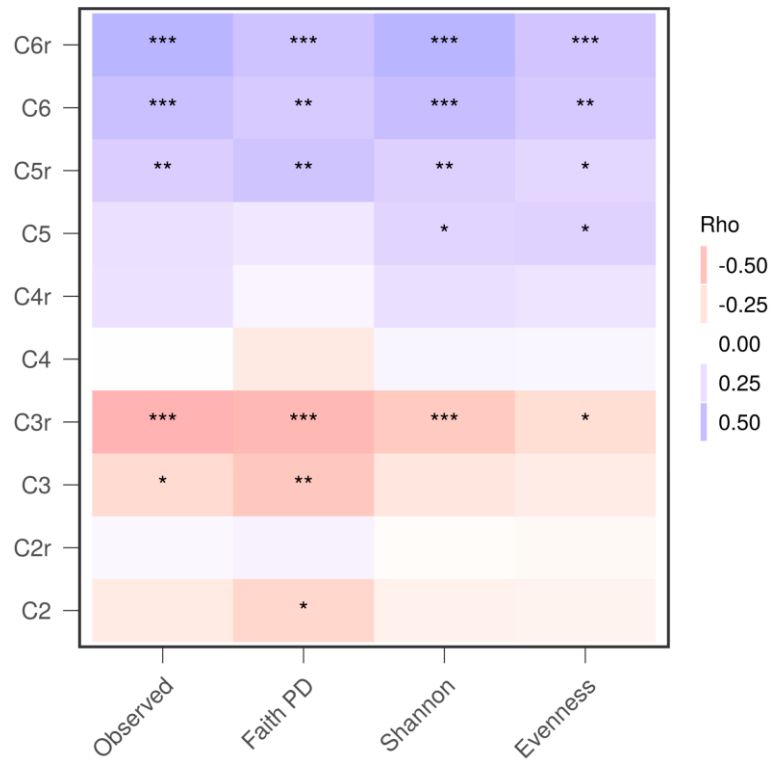

Mapping from p-value ranges to symbols: 0 - 0.001 '\*\*\*', 0.001 - 0.01 '\*\*', 0.01 - 0.05 '\*', 0.05 - 0.1 '.', 0.1 - 1.0 No symbol; C2r - the ratio of acetic acid to all analyzed SCFAs, C3r - The ratio of propionic acid to all analyzed SCFAs, C4r - the ratio of butyric acid to all analyzed SCFAs, C5r - The ratio of valeric acid to all analyzed SCFAs, C6r - The ratio of hexanoic acid to all analyzed SCFAs.

Supplementary Table 1. db-RDA models summary

| Model          | Taxon   | Variance explained - full model*                                       | Simplified model - explanatory variables | Simplified model (R2) | Simplified model (adjusted R2) |
|----------------|---------|------------------------------------------------------------------------|------------------------------------------|-----------------------|--------------------------------|
| Anthropometric | Genus   | Constrained 0.06; Unconstrained 0.94<br><b>P<sub>ANOVA</sub>=0.202</b> | NULL                                     | NULL                  | NULL                           |
|                | Family  | Constrained 0.07; Unconstrained 0.93<br><b>P<sub>ANOVA</sub>=0.189</b> | NULL                                     | NULL                  | NULL                           |
|                | Order   | Constrained 0.05; Unconstrained 0.95<br><b>P<sub>ANOVA</sub>=0.522</b> | NULL                                     | NULL                  | NULL                           |
|                | Class   | Constrained 0.05; Unconstrained 0.95<br><b>P<sub>ANOVA</sub>=0.510</b> | NULL                                     | NULL                  | NULL                           |
|                | Phylum  | Constrained 0.06; Unconstrained 0.94<br><b>P<sub>ANOVA</sub>=0.368</b> | NULL                                     | NULL                  | NULL                           |
|                | MetaCyc | Constrained 0.12; Unconstrained 0.88<br><b>P<sub>ANOVA</sub>=0.003</b> | Visceral, WC                             | 0.09381904            | 0.05962354                     |
| Physiological  | Genus   | Constrained 0.15; Unconstrained 0.85<br><b>P<sub>ANOVA</sub>=0.511</b> | NULL                                     | NULL                  | NULL                           |
|                | Family  | Constrained 0.14; Unconstrained 0.86<br><b>P<sub>ANOVA</sub>=0.598</b> | NULL                                     | NULL                  | NULL                           |
|                | Order   | Constrained 0.15; Unconstrained 0.85<br><b>P<sub>ANOVA</sub>=0.465</b> | NULL                                     | NULL                  | NULL                           |
|                | Class   | Constrained 0.14; Unconstrained 0.86<br><b>P<sub>ANOVA</sub>=0.507</b> | NULL                                     | NULL                  | NULL                           |
|                | Phylum  | Constrained 0.15 Unconstrained 0.85<br><b>P<sub>ANOVA</sub>=0.453</b>  | PWA AP                                   | 0.06529508            | 0.04765914                     |
|                | MetaCyc | Constrained 0.11; Unconstrained 0.89<br><b>P<sub>ANOVA</sub>=0.959</b> | NULL                                     | NULL                  | NULL                           |
| Biochemical    | Genus   | Constrained 0.31; Unconstrained 0.69<br><b>P<sub>ANOVA</sub>=0.145</b> | Glucose                                  | 0.04262094            | 0.02308259                     |
|                | Family  | Constrained 0.32; Unconstrained 0.68<br><b>P<sub>ANOVA</sub>=0.112</b> | Glucose                                  | 0.06366385            | 0.04455495                     |
|                | Order   | Constrained 0.32; Unconstrained 0.68<br><b>P<sub>ANOVA</sub>=0.137</b> | NULL                                     | NULL                  | NULL                           |
|                | Class   | Constrained 0.33; Unconstrained 0.67<br><b>P<sub>ANOVA</sub>=0.107</b> | NULL                                     | NULL                  | NULL                           |
|                | Phylum  | Constrained 0.28; Unconstrained 0.72<br><b>P<sub>ANOVA</sub>=0.453</b> | NULL                                     | NULL                  | NULL                           |
|                | MetaCyc | Constrained 0.32; Unconstrained 0.68<br><b>P<sub>ANOVA</sub>=0.140</b> | Insulin                                  | 0.05522586            | 0.03594476                     |

**P<sub>ANOVA</sub> Monte Carlo permutation test (number of permutations 999)**; variance inflation factor < 10 to avoid co-linearity issues: WC, subcutaneous, visceral from A group, all from the P group, all from the B group)

Supplementary Figure 4. Correlations between bacterial taxa and anthropometric, physiological and biochemical parameters

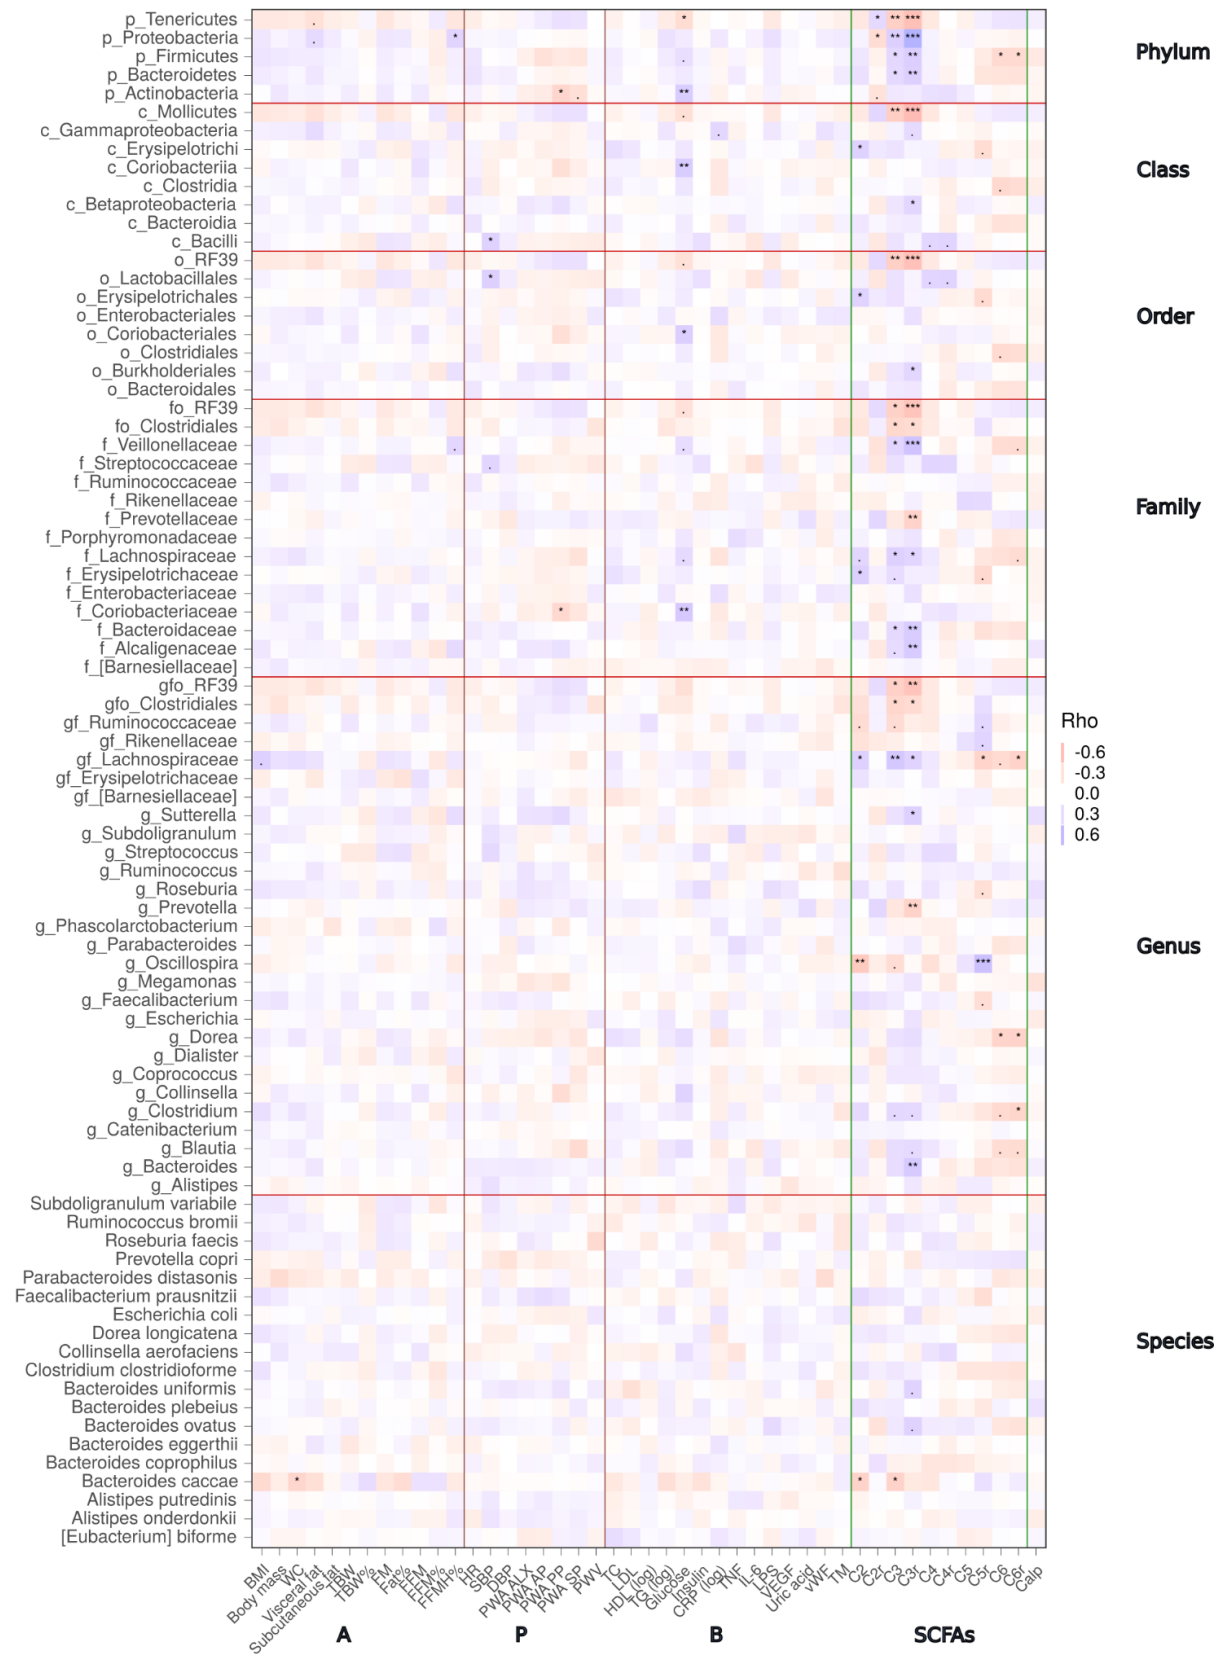

Spearman correlation of the bacterial abundance at the species, genus, family, order, class and phylum levels (separated by horizontal red lines) with anthropometric (A), physiological (P), biochemical (B) parameters (separated by vertical brown lines), short chain fatty acids (SCFAs) and calprotectin (separated by green line). Mapping from FDR adjusted P values ranges to symbols: 0 - 0.001 '\*\*\*\*', 0.001 - 0.01 '\*\*\*', 0.01 - 0.05 '\*\*', 0.05 - 0.1 '.', 0.1 - 1.0 no symbol, Rho - Spearman correlation coefficient; C2r - the ratio of acetic acid to all analyzed SCFAs, C3r - The ratio of propionic acid to all analyzed SCFAs, C4r - the ratio of butyric acid to all analyzed SCFAs, C5r - The ratio of valeric acid to all analyzed SCFAs, C6r - The ratio of hexanoic acid to all analyzed SCFAs.



ratio of propionic acid to all analyzed SCFAs, C4r - the ratio of butyric acid to all analyzed SCFAs, C5r - The ratio of valeric acid to all analyzed SCFAs, C6r - The ratio of hexanoic acid to all analyzed SCFAs.



Supplementary Table 2. Phylum relative abundance

|                | This study <sup>1</sup><br>(n=56) | BMI-NORMAL<br>(n=1,293) | BMI-HIGH<br>(n=875) |
|----------------|-----------------------------------|-------------------------|---------------------|
| Actinobacteria | 3.06%                             | 1.09%                   | 0.91%               |
| Bacteroidetes  | 36.1%                             | 27.8%                   | 30.1%               |
| Cyanobacteria  | 0.13%                             | 0.14%                   | 0.14%               |
| Firmicutes     | 52.7%                             | 34.2%                   | 33.2%               |
| Fusobacteria   | 0.016%                            | 0.51%                   | 0.23%               |
| Proteobacteria | 5.82%                             | 32.8%                   | 32.9%               |
| Tenericutes    | 2.08%                             | 0.80%                   | 0.50%               |

BMI-NORMAL, BMI-HIGH > 0.1%; this study >0.1%, 1 - Time0

Class

This study vs BMI-HIGH: 997.4, p<0.0001

This study vs BMI-NORMAL: 691.4, p<0.0001

BMI-HIGH vs BMI-NORMAL: 203.0, p<0.0001

Order

This study vs BMI-HIGH: 994.3, p<0.0001

This study vs BMI-NORMAL: 647.8, p<0.001

BMI-HIGH vs BMI-NORMAL: -26.9, p=1

Family

This study vs BMI-HIGH: 2098.7, p<0.0001

This study vs BMI-NORMAL: 1509.3, p<0.0001

BMI-HIGH vs BMI-NORMAL: -222.9, p=1

Genus

This study vs BMI-HIGH: 2615.9, p<0.0001

This study vs BMI-NORMAL: 2031.9, p<0.0001

BMI-HIGH vs BMI-NORMAL: -1343, p<0.0001
